# Supplementary material for: MoS2 nanosheets vertically grown on CoSe2 hollow nanotube arrays as an efficient catalyst for the hydrogen evolution reaction
Source: Royal Society of Chemistry journal article supplement (doi:10.1039/d1nr05941f), 2022-01-01
Supplement: d1nr05941f1.pdf [file d1nr05941f1.pdf]

Supplementary Materials

## MoS<sub>2</sub> nanosheets vertically grown on CoSe<sub>2</sub> hollow nanotube arrays as an efficient catalyst for hydrogen evolution reaction

Liang Yuan<sup>a,b</sup>, Yingmeng Zhang<sup>a</sup>, Jinhong Chen<sup>a</sup>, Yongliang Li<sup>a</sup>, Xiangzhong Ren<sup>a</sup>, Peixin Zhang<sup>a</sup>, Liwei Liu<sup>b</sup>, Jinxiang Zhang<sup>c</sup>, Lingna Sun<sup>a,\*</sup>

<sup>a</sup> College of Chemistry and Environmental Engineering, Shenzhen University, Shenzhen 518060, Guangdong, P. R. China.

<sup>b</sup> College of Physics and Optoelectronic Engineering, Shenzhen University, Shenzhen 518060, Guangdong, P. R. China.

<sup>c</sup> School of Chemistry and Environmental Engineering, Hanshan Normal University, Chaozhou 521041, Guangdong, P. R. China.

\* Corresponding author. E-mail: sunln@szu.edu.cn.

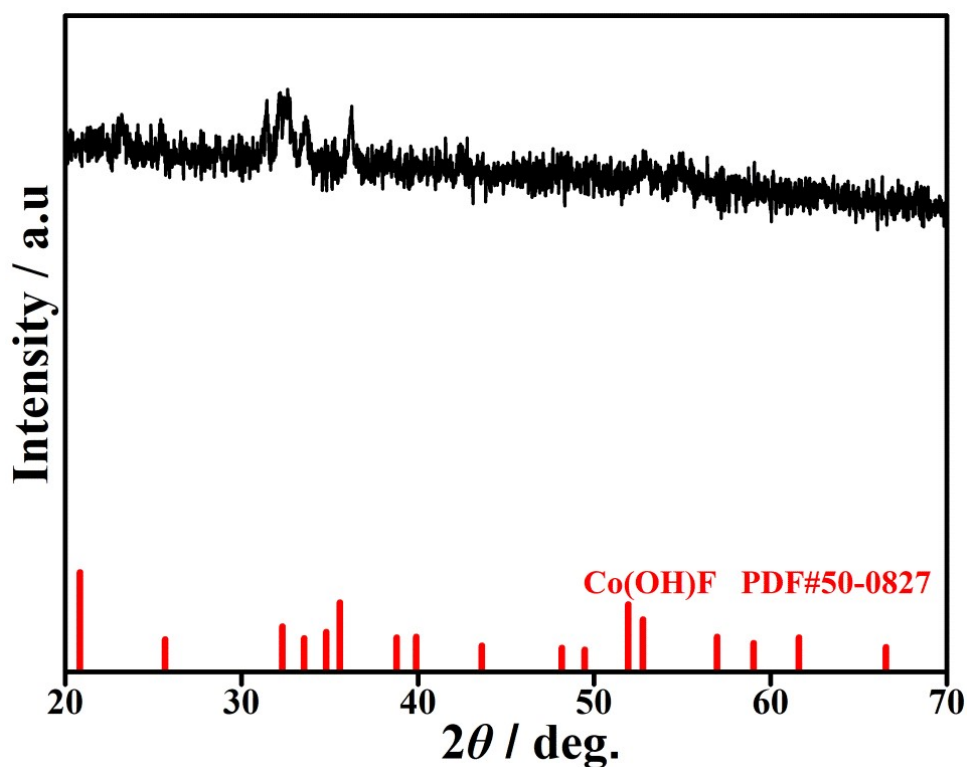

Fig. S1 XRD pattern of Co(OH)F precursor

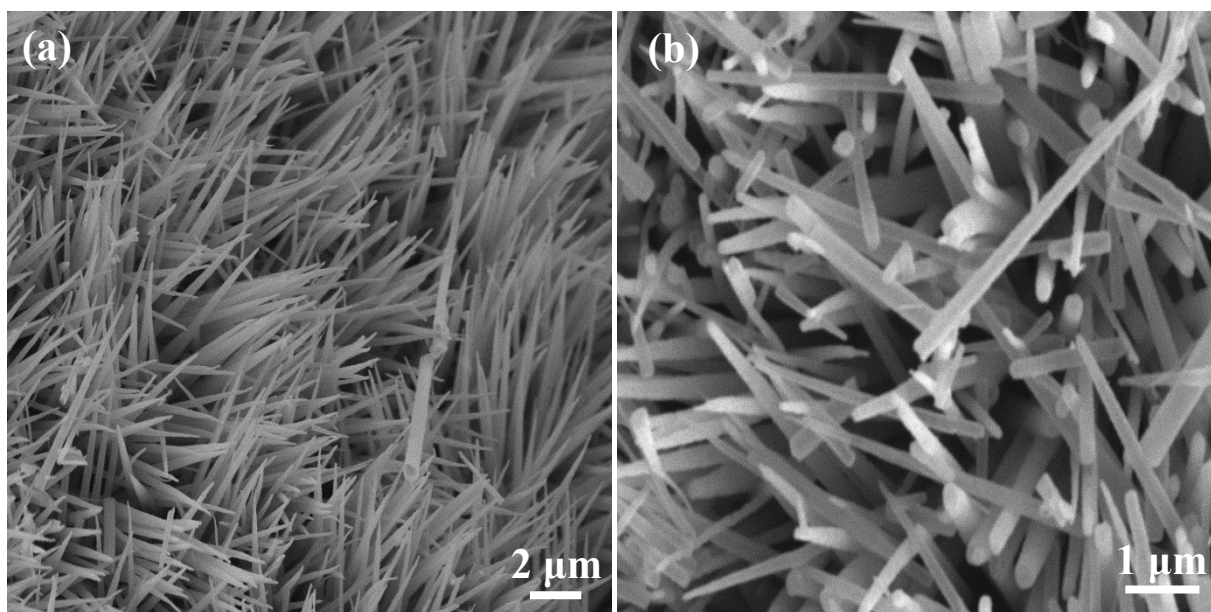

Fig. S2 SEM images of Co(OH)F precursor

(a)  $\times 5000$ ; (b)  $\times 15\text{ k}$

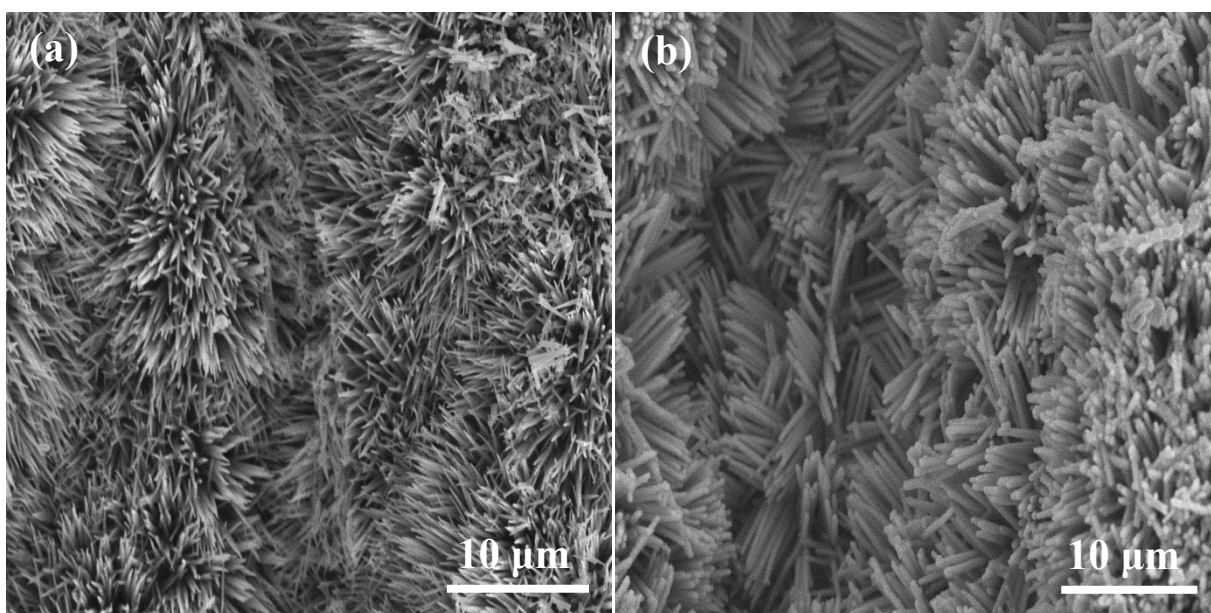

Fig. S3 Low-magnification SEM images of CoSe<sub>2</sub>-CC and MoS<sub>2</sub>@CoSe<sub>2</sub>-CC

(a) CoSe<sub>2</sub>-CC; (b) MoS<sub>2</sub>@CoSe<sub>2</sub>-CC

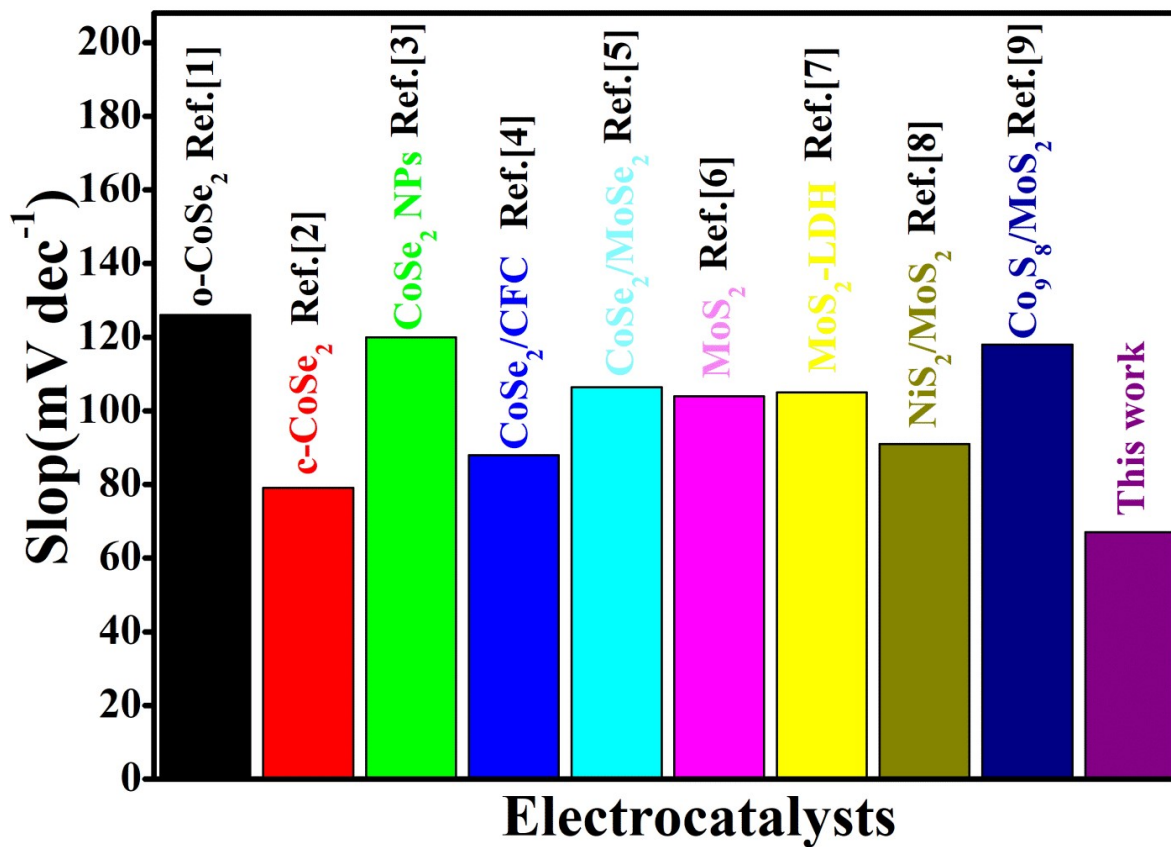

Fig. S4 Comparison of the Tafel slopes required to generate a current density of 10 mA cm<sup>-2</sup> for different MoS<sub>2</sub>-base and CoSe<sub>2</sub>-base catalysts.

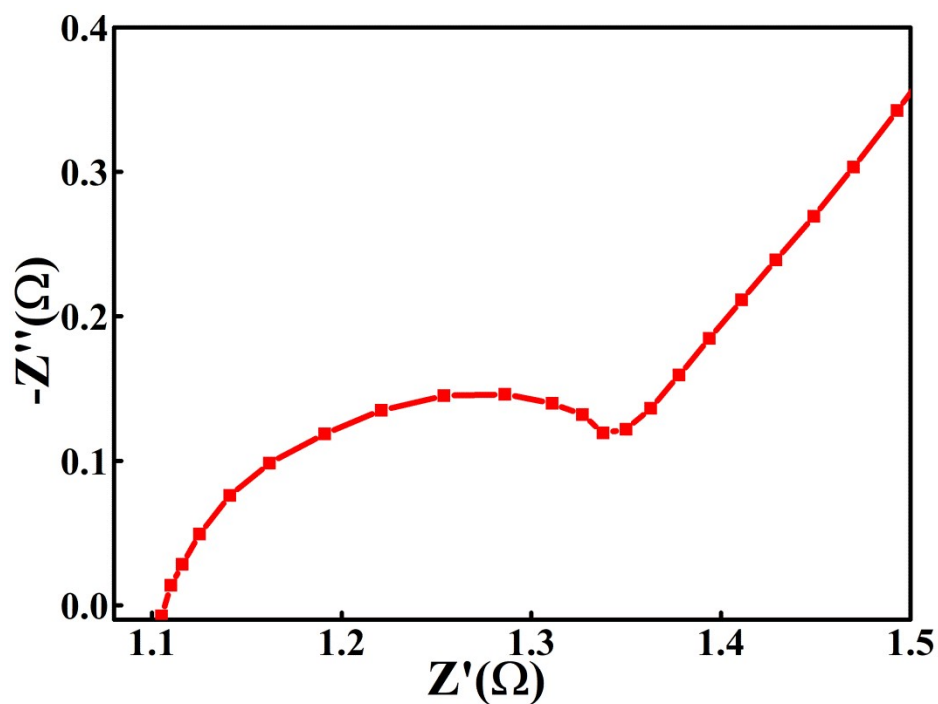

Fig. S5 Nyquist plots of bare CoSe<sub>2</sub>-CC at high frequency region in 1.0 M KOH

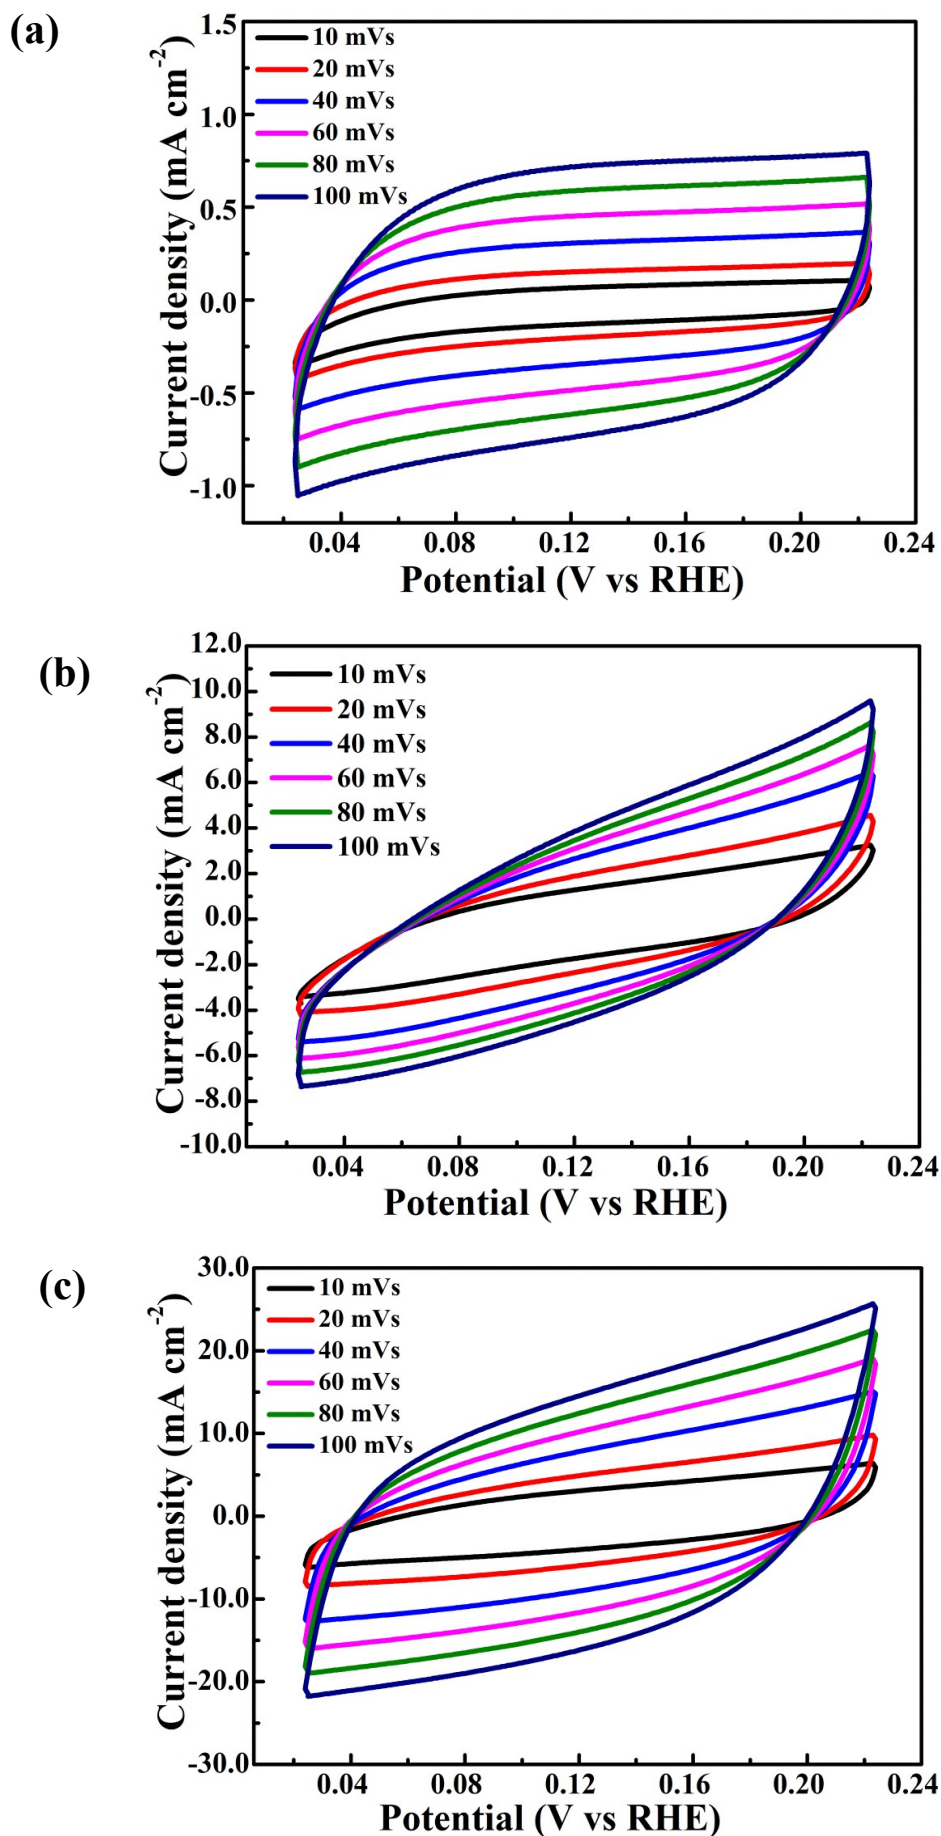

Fig. S6 Typical cyclic voltammogram curves of bare  $\text{MoS}_2\text{-CC}$ ,  $\text{CoSe}_2\text{-CC}$  and  $\text{MoS}_2\text{@CoSe}_2\text{-CC}$  hybrid in 1.0 M KOH

(a) bare  $\text{MoS}_2\text{-CC}$ ; (b) bare  $\text{CoSe}_2\text{-CC}$ ; (c)  $\text{MoS}_2\text{@CoSe}_2\text{-CC}$  hybrid

## S7. Electrochemical Active Surface Area (ECSA) Determination

A fair comparison of TOFs has not yet been carried out due to variations in methods for measuring the active sites in addition to the issues associated with different catalyst structures<sup>10</sup>. Indeed, in most of the cases, ECSA-derived TOFs have afforded a fairer comparison between different electrocatalysts and this method was adopted to calculate TOFs in this work<sup>11-12</sup>. Electrochemical surface area (ECSA) is the ratio of the double layer capacitance to the specific capacitance for a flat surface, so the value of ECSA can be calculated as follows<sup>13</sup>:

$$ECSA = \frac{\text{double layer capacitance}}{\text{specific capacitance}} \quad (1)$$

The specific capacitance for a flat surface is generally found to fall within the range of 20-60  $\mu\text{F cm}^{-2}$ . Because for many metals and transition metal semiconductors, the double layer capacitance after surface area normalization is comparable in the same electrolyte<sup>14-16</sup>. Therefore, assuming that the specific capacitance of a flat surface is  $\sim 40 \mu\text{F}$  for  $1 \text{ cm}^2$  of real surface area, which is a moderate value adopted in this paper and then the ECSA is estimated as:

$$ECSA = \frac{\text{double layer capacitance (mF cm}^{-2}\text{)}}{40 \mu\text{F cm}^{-2} \text{ per cm}_{ECSA}^2} \quad (2)$$

### Assessment of turnover frequency (TOF)

TOF was calculated using the following formula<sup>17</sup>:

$$TOF = \frac{j \times N_A}{2n \times F \times ECSA} \quad (3)$$

where  $j$  is the current density at certain overpotential, which can be obtained from HER polarization curves,  $N_A$  is the Avogadro's number ( $6.022 \times 10^{23}$  molecules/mole),  $F$  is the Faraday constant ( $96485 \text{ C mol}^{-1}$ ), 2 is the stoichiometric number which represents that two electrons are consumed to form one hydrogen molecule during the electrode HER reaction,  $n$  is the number of active sites in a flat  $1 \text{ cm}^2$  surface of catalyst samples and ECSA is the electrochemically active surface area of the electrode. The number of surface active sites were estimated to be  $1.16 \times 10^{15} \text{ cm}^{-2}$  and  $4.17 \times 10^{14} \text{ cm}^{-2}$  for  $\text{MoS}_2$  and  $\text{CoSe}_2$  based on their lattice constants<sup>18-21</sup>, respectively. In addition, the number of surface active sites for  $\text{MoS}_2@CoSe_2$  hybrid can be estimated approximately to be  $8.27 \times 10^{14} \text{ cm}^{-2}$  by assuming that cobalt selenide molecules are orderly connected with molybdenum sulfide molecules. Similar approach has been used to estimate TOFs for  $\text{MoS}_x@Mo_2C$ <sup>16</sup> and  $Ni_9S_8@MoS_2$ <sup>18</sup>.

Conversion of measured current to  $H_2$  turnover (assuming 100% Faradaic efficiency):

$$TOF = \left( \frac{j}{\text{cm}^2} \right) \left( \frac{1 \text{ C} \cdot \text{s}^{-1}}{1000 \text{ mA}} \right) \left( \frac{1 \text{ mol } e^-}{96485 \text{ C}} \right) \left( \frac{1 \text{ mol } H_2}{2 \text{ mol } e^-} \right) \left( \frac{6.022 \times 10^{23} H_2}{1 \text{ mol } H_2} \right) = \left( 3.12 \times 10^{15} \frac{H_2 \cdot \text{s}^{-1}}{\text{cm}^2} \right) \text{ per } \frac{\text{mA}}{\text{cm}^2} \quad (4)$$

So, the number of TOF can be calculated as the following formula:

$$TOF = \frac{3.12 \times 10^{15} \times |j|}{\text{The number of surface active sites}} \quad (5)$$

Where  $j$  is the current density. Therefore plotted TOFs in the potential range was shown in Fig. S7.

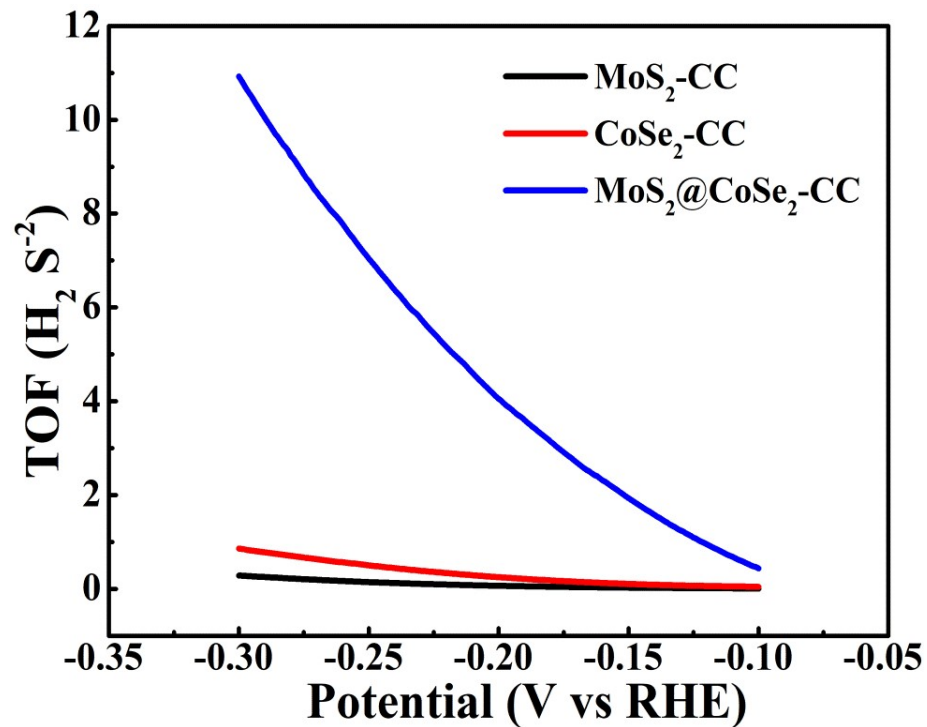

Fig. S7. Turnover frequency (TOF) curves of MoS<sub>2</sub>-CC, CoSe<sub>2</sub>-CC and MoS<sub>2</sub>@CoSe<sub>2</sub>-CC at different potentials.

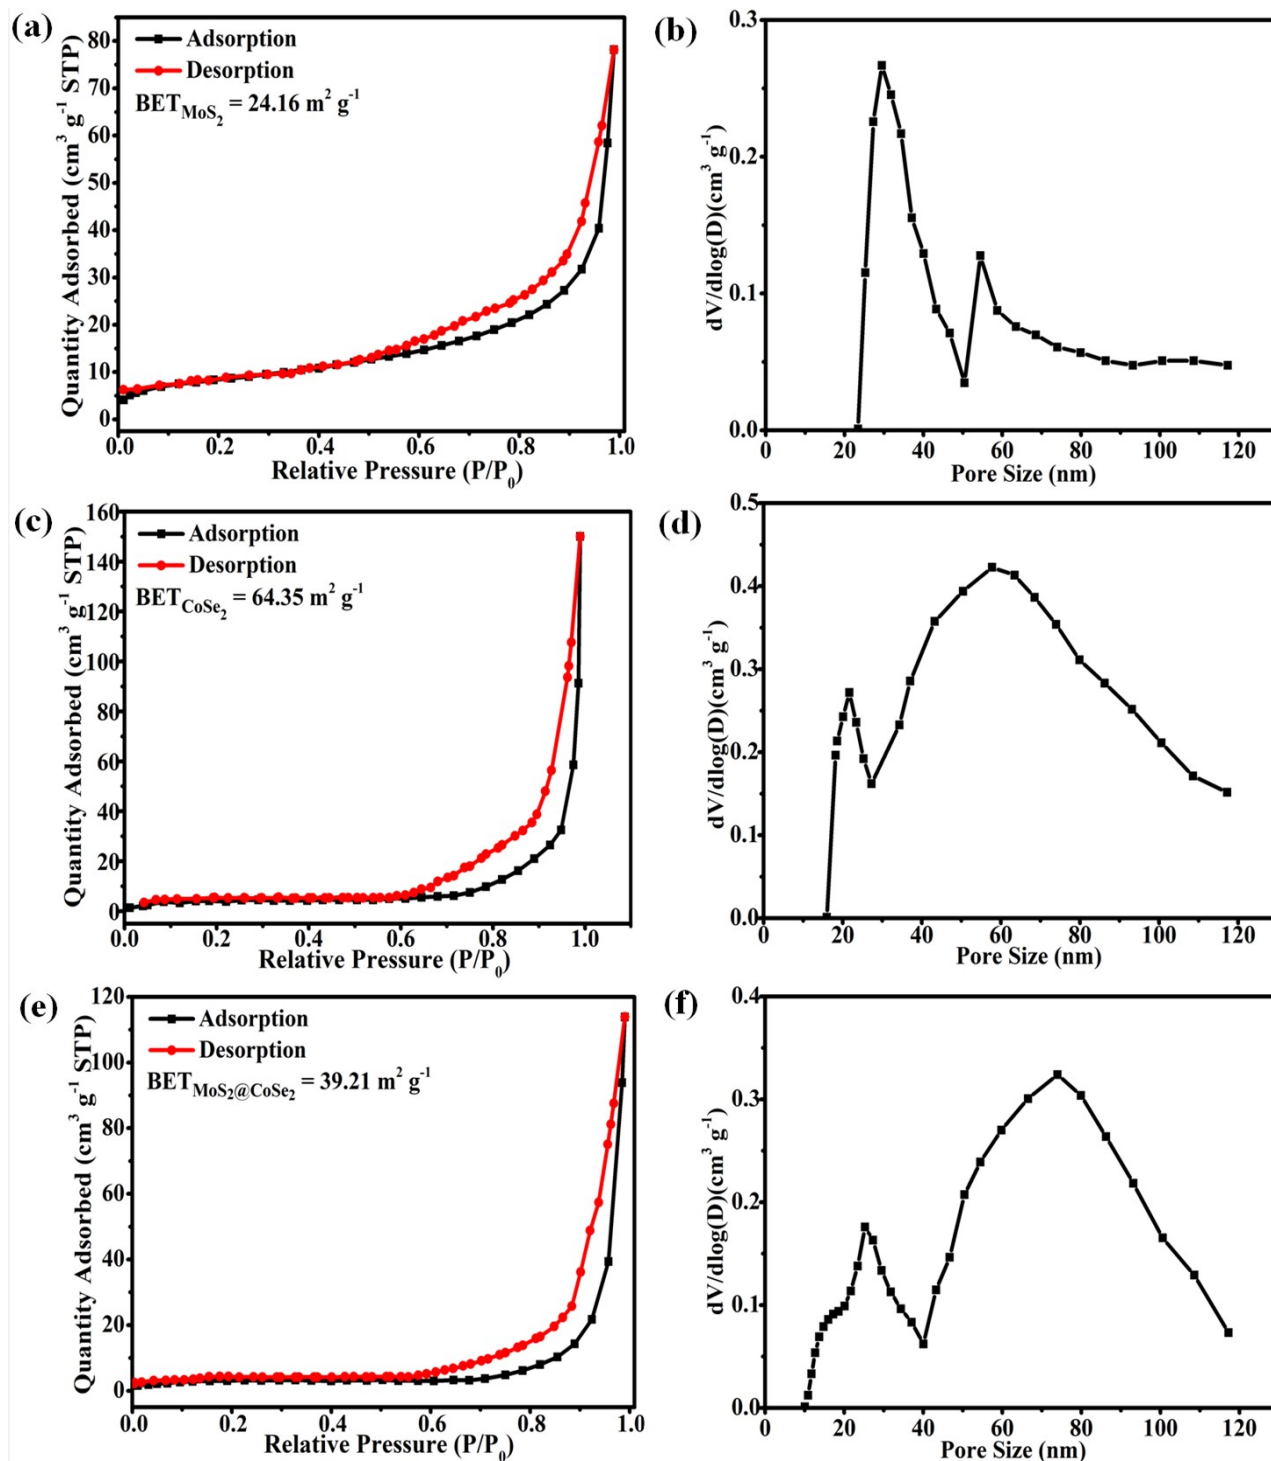

Fig. S8 Nitrogen adsorption-desorption isotherms and size distribution curves of bare  $\text{MoS}_2\text{-CC}$ ,  $\text{CoSe}_2\text{-CC}$  and  $\text{MoS}_2@\text{CoSe}_2\text{-CC}$  hybrid

(a,b) bare  $\text{MoS}_2\text{-CC}$ ; (c,d) bare  $\text{CoSe}_2\text{-CC}$ ; (e,f)  $\text{MoS}_2@\text{CoSe}_2\text{-CC}$  hybrid.

Supplementary Table 1. ICP results show the loading of Mo, Co and Se elements in MoS<sub>2</sub>@CoSe<sub>2</sub>-CC catalyst

| Element                      | Co    | Mo     | Se     |
|------------------------------|-------|--------|--------|
| Amount (mg L <sup>-1</sup> ) | 7.149 | 24.316 | 21.690 |

## References

- [1] P. Chen, K. Xu, S. Tao, T. Zhou, Y. Tong, H. Ding, L. Zhang, W. Chu, C. Wu, Y. Xie. *Adv. Mater.*, 2016, **28**, 7527-7532.
- [2] H.M. Li, X. Qian, C.L. Zhu, X.C. Jiang, L. Shao, L.X. Hou. *J. Mater. Chem. A.*, 2017, **5** 4513-4526.
- [3] X.Q. Wang, B.J. Zheng, B.Yu, B. Wang, W.Q. Hou, W.L. Zhang, Y.F. Chen. *J. Mater. Chem. A.*, 2018, **6**, 7842-7850.
- [4] Q.C. Dong, Q.Wang, Z.Y. Dai, H.J. Qiu, X.C. Dong. *ACS Appl. Mater. Interfaces*, 2016, **8**, 26902-26907.
- [5] X.L. Tang, J.Y. Zhang, B.B Mei, X.M. Zhang, Y.P. Liu, J.X. Wang, W. Li. *Chem. Eng. J.*, 2021, **404**, 126529
- [6] H. Lin, H. Li, Y. Li, J. Liu, X. Wang, L. Wang. *J. Mater. Chem. A.*, 2017, **5**, 25410-25419.
- [7] G.Q. Zhao, Y.Lin, K. Rui, Q. Zhou, Y.P. Chen, S.X Dou, W.P. Sun. *Nanoscale*, 2018, **10**, 19074-19081.
- [8] X.X. Wang, L. Li, Z. Wang, L. Tan, Z.Y. Wu, Z.L. Liu, S.L. Gai, P.P. Yang. *Electrochim Acta*, 2019, **326**, 134983
- [9] T.T. Chen, R. Wang, L.K. Li, Z.J. Li, S.Q. Zang. *J. Energ. Chem.*, 2020, **44** , 90-96.
- [10] B. Seo, S.H. Joo. *Nano Convergence*, 2017, **4**.
- [11] E.J. Popczun, J.R. Mckone, C.G. Read, A.J. Biacchi, A.M. Wiltrout, N.S. Lewis, R.E. Schaak, *J. Am. Chem. Soc.*, 2013, **135**, 9267-9270.
- [12] B. Seo, D.S. Baek, Y.J. Sa, S.H. Joo, *CrystEngComm*, 2016, **18**, 6083-6089.
- [13] Z. Lin, L.F. Shen, X.M. Qu, J.M. Zhang, Y.X. Jiang, S.G. Sun. *Acta Phys. -Chim. Sin*, 2019, **35**, 523-530.
- [14] R.Q. Ye, P. del Angel-Vicente, Y.Y. Liu, M.J. Arellano-Jimenez, Z.W. Peng, T. Wang, Y.L. Li, B.I. Yakobson, S.H. Wei, M.J. Yacaman, J.M. Tour. *Adv. Mater.*, 2016, **28**, 1427-1432.
- [15] J. Kibsgaard, T.F. Jaramillo. *Angewandte Chemie*, 2014, **53**, 14433-14437.
- [16] C.Y. Tang, W. Wang, A. Sun, C.K. Qi, D.Z. Zhang, Z.Z. Wu, D.Z. Wang. *ACS Catal*, 2015, **5**, 6956-6963.
- [17] Y. Yan, X.M. Ge, Z.L. Liu, J.Y. Wang, J.M. Lee, X. Wang. *Nanoscale*, 2013, **5**, 7768-7771.
- [18] X. Xu, W. Zhong, L. Zhang, G. Liu, Y. Du. *J. Colloid Interf. Sci*, 2019, **556**, 24-32.
- [19] G. Zhao, P. Li, K. Rui, Y. Chen, S. Dou, W. Sun. *Chem.-Eur. J*, 2018, **24**, 11158-11165.
- [20] J.D. Benck, Z. Chen, L.Y. Kuritzky, A.J. Forman, T.F. Jaramillo. *ACS Catal*, 2012, **2**, 1916-1923.
- [21] A.I. Carim, F.H. Saadi, M.P. Soriaga, N.S. Lewis. *J. Mater. Chem. A.*, 2014, **2**, 13835-13839
